# Supplementary material for: Aptamer-enhanced fluorescence determination of bisphenol A after magnetic solid-phase extraction using Fe3O4@SiO2@aptamer
Source: Royal Society of Chemistry journal article supplement (doi:10.1039/d0ay01124j), 2020-01-01
Supplement: d0ay01124j1.pdf [file d0ay01124j1.pdf]

## Supporting Information for

### **Aptamer-enhanced fluorescence determination of bisphenol A after magnetic solid-phase extraction using Fe<sub>3</sub>O<sub>4</sub>@SiO<sub>2</sub>@ Aptamer**

Zhou Xu\*<sup>a</sup>, Yanqiu Chen<sup>a</sup>, Yao Tang<sup>a</sup>, Maolong Chen<sup>a</sup>, Wei Chen<sup>b</sup> and Yunhui Cheng\*<sup>a</sup>

<sup>a</sup>. *School of Chemistry and Food Engineering, Changsha University of Science & Technology, Changsha 410114, China.*

<sup>b</sup>. *School of Food and Biological Engineering, Hefei University of Technology, Hefei 230009, China.*

*\*Corresponding author. E-mail addresses: xz\_jnu@126.com (Z. Xu) ; Chengyh6488@gmail.com (YH. Cheng);*

## 1. O 1s core-level XPS spectra of Fe<sub>3</sub>O<sub>4</sub>@SiO<sub>2</sub>-NH<sub>2</sub> and Fe<sub>3</sub>O<sub>4</sub>@SiO<sub>2</sub>@Apt

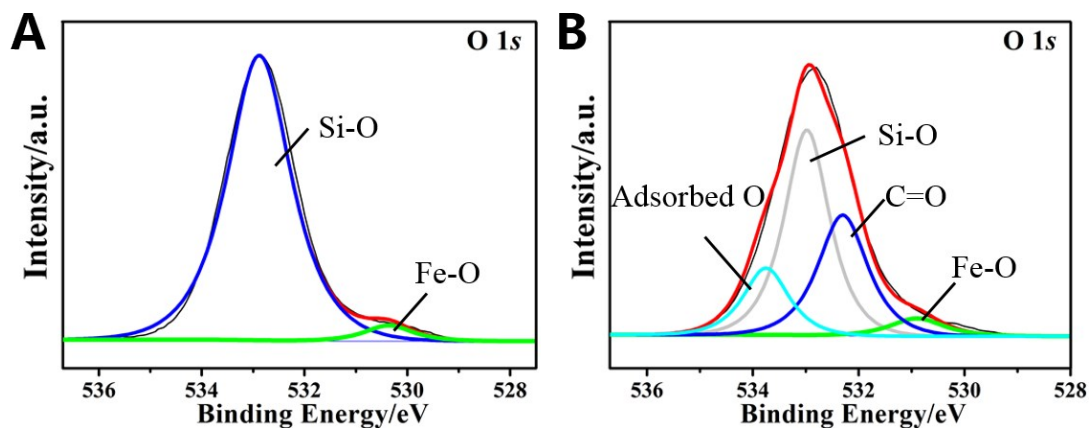

Fig. S1. O 1s core-level XPS spectra of (A) Fe<sub>3</sub>O<sub>4</sub>@SiO<sub>2</sub>-NH<sub>2</sub>, (B) Fe<sub>3</sub>O<sub>4</sub>@SiO<sub>2</sub>@Apt.

## 2. Label the number of aptamers on superparamagnetic nanoparticles

The coupling rate of BPA aptamer on Fe<sub>3</sub>O<sub>4</sub>@SiO<sub>2</sub>-NH<sub>2</sub> nanoparticles was studied using a FAM-labeled BPA aptamer (5'-carboxyl-CCG GTG GGT GGT CAG GTG GGA TAG CGT TCC GCG TAT GGC CCA GCG CAT CAC GGG TTC GCA CCA-3'-FAM). First, a set of five concentrations of FAM-labeled BPA aptamers (20 to 100 nM) was prepared as standards to draw a calibration curve of fluorimetry, as shown in Fig. S2. One milliliter of the Fe<sub>3</sub>O<sub>4</sub>@SiO<sub>2</sub>-NH<sub>2</sub> nanoparticles ( $3.3 \times 10^{-11}$  M) was activated by 0.3 mL of EDC (200 mM) and NHS (100 mM) for 30 min. After magnetic separation, the Fe<sub>3</sub>O<sub>4</sub>@SiO<sub>2</sub>-NH<sub>2</sub> nanoparticles ( $3.3 \times 10^{-14}$  mol) and 100  $\mu$ L of FAM-labeled BPA aptamer ( $1.0 \times 10^{-7}$  M) was incubated in binding buffer (Tris 40mM, NaCl 100mM, CaCl<sub>2</sub> 5mM and MgCl<sub>2</sub> 5mM, pH7.4) for 6 h at room temperature. Add 100  $\mu$ L of FAM-labeled BPA aptamer (0 M) as a blank sample. Magnetic separation was applied to separate bound from unbound FAM-labeled BPA aptamers. The fluorescence absorption of supernatant was then measured by fluorescence spectroscopy (F-7000 FL spectrophotometer). Excitation and emission wavelengths were set at 492 nm and 518 nm, respectively. Related concentration was calculated by standard curve and the concentration of bound FAM-labeled BPA aptamers was extracted according to the fluorescence absorbance of samples considering Equation 1.

$$A_{bound} = [A_{initial} - A_{unbound}] - A_{blank} \quad Eq. 1$$

The experiments were performed in triplicate. The results showed that the unbound FAM-labeled BPA aptamers were about  $8.9 \times 10^{-8}$  M ( $8.9 \times 10^{-12}$  mol), therefore the bound FAM-labeled BPA aptamers were  $1.1 \times 10^{-8}$  M ( $1.1 \times 10^{-12}$  mol). The molar ratio of the bound aptamers with  $Fe_3O_4@SiO_2-NH_2$  was 30:1."

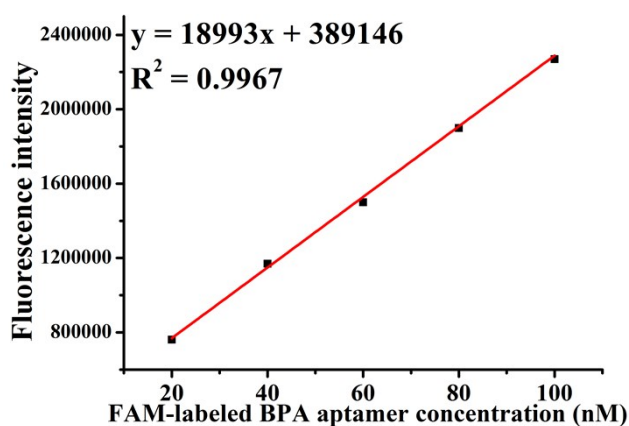

Fig. S2. Plot of fluorescence intensity versus FAM-labeled BPA aptamers concentration.

### 3. The dissociation constant ( $K_d$ ) of the $Fe_3O_4@SiO_2@Apt$ towards free BPA

Standard stock solutions of BPA ( $10 \mu M$ ) were prepared with a mobile phase of methanol/ $H_2O$  (50/50, v/v). The stock solutions were further diluted with the mobile phase to obtain BPA solutions at 15 concentrations from  $10 \mu M$  to  $0.1 nM$ . One milliliter BPA solutions were added to 10 mL centrifuge tubes, and 10 mg of  $Fe_3O_4@SiO_2@Apt$  (approximately  $11 nM$  of BPA-aptamer bound) was dispersed into the sample solutions using a homemade stirrer for 3 min. After standing for 15 min, magnetic separation was applied to separate bound from unbound BPA. An  $80 \mu L$  supernatant sample was subjected to HPLC analysis to determine the concentration of unbound BPA. The experiments were performed in triplicate. The initial concentration of BPA was  $A_0$ , the unbound concentration after incubation was  $A_1$ , the fraction bound was calculated as  $(A_0 - A_1)/A_0$ . The dissociation constants, or  $K_d$ , were calculated from the resulting sigmoidal curves using the built-in Hill1 sigmoidal

fit in Origin 8.5.

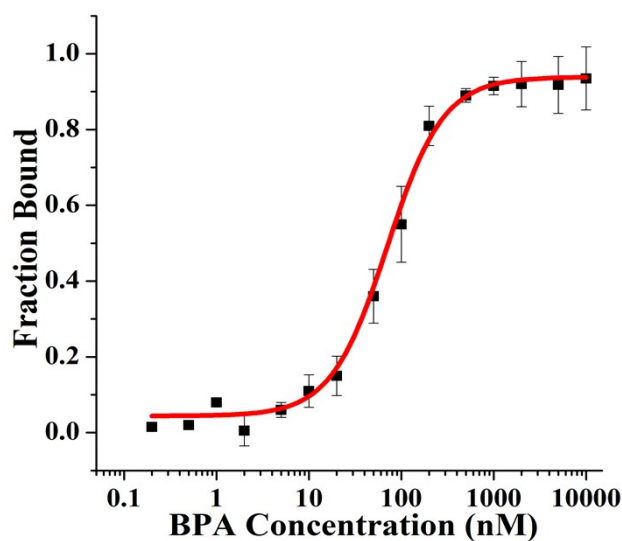

Fig. S3. Binding behavior of free BPA to the  $\text{Fe}_3\text{O}_4@\text{SiO}_2@\text{Apt}$  ( $K_d \sim 70.38$  nM,  $r^2 = 0.988$ ).

#### 4. Calculation method of LOD and LOQ

The LOD of this method was calculated by  $3\sigma_b/\text{slope}$ , and the limit of quantitation (LOQ) was calculated by  $10\sigma_b/\text{slope}$  ( $\sigma_b$ , standard deviation of the blank samples).

#### 5. Inter-day and intra-day precision of the method

Table S1 Inter-day and intra-day precision of the method

| Analytes | Inter-day precision (RSD%, n=5) |        |      | Intra-day precision (RSD%, n=5) |        |      |
|----------|---------------------------------|--------|------|---------------------------------|--------|------|
|          | Low                             | Medium | High | Low                             | Medium | High |
| BPA      | 9.5                             | 8.1    | 6.3  | 8.6                             | 7.9    | 4.9  |

“High”, “Medium”, and “Low” denote the concentrations of BPA in milk samples were 100, 20, and 5  $\text{ng mL}^{-1}$ , respectively.
